# Supplementary material for: Soil-to-Wheat Transfer of Heavy Metals Depending on the Distance from the Industrial Zone
Source: MDPI journal article supplement (doi:10.3390/agronomy13041016), 2023-03-30
Supplement: s1 [file s1]

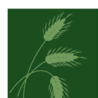

Table S1: Analysis of variance for heavy metal content measured in roots of wheat in different phenophases and localities

| Source of Variation | Df | Zn      | Pb      | Cr                 | Cu                 | Cd                 |
|---------------------|----|---------|---------|--------------------|--------------------|--------------------|
| Sum of Squares (%)  |    |         |         |                    |                    |                    |
| Locality (L)        | 2  | 20.10** | 9.13**  | 11.38**            | 16.51**            | 0.70 <sup>ns</sup> |
| Genotype (G)        | 3  | 12.93** | 22.58** | 8.41**             | 29.18**            | 16.19**            |
| Phenophase (P)      | 1  | 8.04**  | 9.52**  | 15.84**            | 1.55 <sup>ns</sup> | 57.66**            |
| L × G               | 6  | 16.67** | 18.12** | 16.24**            | 24.62**            | 2.71**             |
| P × G               | 3  | 7.58**  | 27.58** | 21.71**            | 3.42**             | 17.05**            |
| L × P               | 2  | 18.81** | 7.34**  | 0.03 <sup>ns</sup> | 1.62 <sup>ns</sup> | 1.36 <sup>ns</sup> |
| L × G × P           | 6  | 15.79** | 5.60**  | 26.21**            | 22.88**            | 2.22*              |
| Error               | 48 | 0.08    | 0.12    | 0.18               | 0.20               | 2.12               |
| Total               | 71 | 100.00  | 100.00  | 100.00             | 100.00             | 100.00             |

Note: The share of the sum of squares (%) of the analyzed factors and their interactions is expressed in relation to the sum of squares of the total (100%); \*\*  $p < 0.01$ , \*  $p < 0.05$ , ns— not significant.

Table S2: Analysis of variance for heavy metal content measured in stems of wheat in different phenophases and localities

| Source of Variation | Df | Zn      | Pb      | Cr      | Cu      | Cd                 |
|---------------------|----|---------|---------|---------|---------|--------------------|
| Sum of Squares (%)  |    |         |         |         |         |                    |
| Locality (L)        | 2  | 13.66** | 10.84** | 4.43**  | 11.60** | 12.87**            |
| Genotype (G)        | 3  | 26.99** | 7.16**  | 47.71** | 26.20** | 1.66 <sup>ns</sup> |
| Phenophase (P)      | 1  | 8.14**  | 5.33**  | 7.75**  | 10.16** | 44.43**            |
| L × G               | 6  | 12.63** | 30.10** | 8.86**  | 18.30** | 15.68**            |
| P × G               | 3  | 19.16** | 16.22** | 18.90** | 13.60** | 3.83**             |
| L × P               | 2  | 7.73**  | 17.28** | 2.52**  | 6.60**  | 10.13**            |
| L × G × P           | 6  | 11.67** | 13.01** | 9.75**  | 13.47** | 10.40**            |
| Error               | 48 | 0.03    | 0.07    | 0.07    | 0.06    | 0.99               |
| Total               | 71 | 100.00  | 100.00  | 100.00  | 100.00  | 100.00             |

Note: The share of the sum of squares (%) of the analyzed factors and their interactions is expressed in relation to the sum of squares of the total (100%); \*\*  $p < 0.01$ , \*  $p < 0.05$ , ns— not significant.
